# Supplementary material for: Mining raw plant transcriptomic data for new cyclopeptide alkaloids
Source: publisher site journal article supplement (doi:10.3762/bjoc.20.138), 2024-07-11

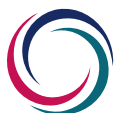

## Supporting Information

for

### Mining raw plant transcriptomic data for new cyclopeptide alkaloids

Draco Kriger, Michael A. Pasquale, Brigitte G. Ampolini and Jonathan R. Chekan

*Beilstein J. Org. Chem.* **2024**, *20*, 1548–1559. [doi:10.3762/bjoc.20.138](https://doi.org/10.3762/bjoc.20.138)

### The full cladogram with species names as a high-resolution pdf

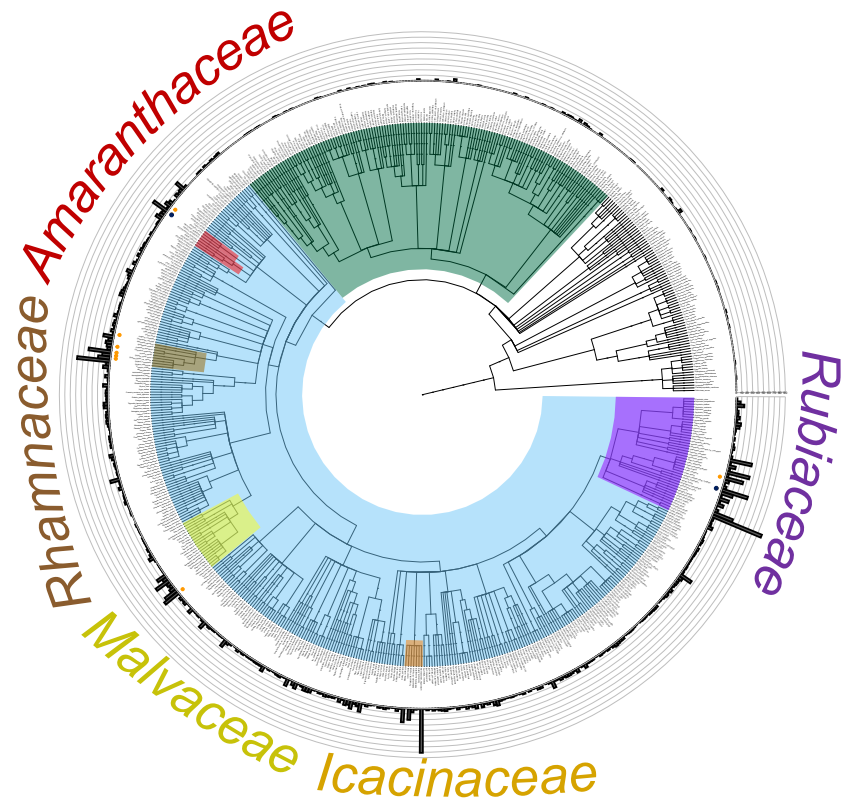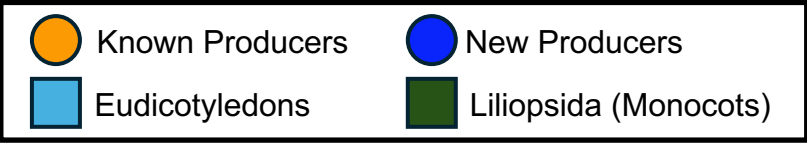

Supplement: Additional file 3 [file 1860-5397-20-138-S3.pdf]
