# Supplementary material for: Mining raw plant transcriptomic data for new cyclopeptide alkaloids
Source: Beilstein J Org Chem. 2024 Jul 11;20:1548–59. doi: 10.3762/bjoc.20.138 (PMC11250218; doi:10.3762/bjoc.20.138)
Supplement: File 2 — Specific dataset used are listed in this Supporting Table File along with core peptide sequence alignments. [file Beilstein_J_Org_Chem-20-1548-s002.xlsx]

## Sheet: TreeData
ID	SRA_#	Known or New Burpitide producer	Numer of Precursor Peptides
Abelmoschus_manihot	SRR17184302	no	9
Abies_koreana	SRX20999648	no	0
Acer_fabri	SRR23679478	no	2
Acer_saccharum	SRR22133662	no	1
Acorus_calamus	SRX20117627	no	0
Acorus_calamus_var._americanus	SRR8674871	no	0
Acorus_gramineus	SRX20117617	no	0
Acorus_gramineus	SRX20117620	no	0
Acrocomia_aculeata	SRX4673740	no	0
Actinidia_chinensis	SRX23021710	no	1
Actinidia_deliciosa	SRR21800379	no	2
Aganosma_wallichii	SRR12990042	no	2
Aglaonema_modestum	SRX14865569	no	1
Aglaonema_nitidum	SRX14865571	no	1
Ailanthus_altissimus	SRR19346871	no	18
Akebia_sp.	SRR20301824	no	0
Alangium_chinense	SRR12009661	no	3
Albizia_julibrissin	SRX6901075	no	12
Aletris_farinosa	SRR19179843	no	1
Alisma_plantago-aquatica	ERX11418699	no	0
Allionia_incarnata	SRR13316968	no	7
Allium_cepa	SRX17790828	no	0
Alocasia_odora	SRX18381545	no	0
Aloe_vera	SRX8420625	no	0
Alpinia_mutica	SRX21505581	no	0
Alpinia_oxyphylla	SRX6686134	no	0
Alstonia_scholaris	SRX13827122	no	6
Alternanthera_bettzickiana	SRR15506171	no	31
Althaea_officinalis	SRR23908484	no	7
Amaranthus_tricolor	SRX11406718	no	5
Amborella_trichopoda	SRR9087794	no	0
Ammopiptanthus_nanus	SRR23694546	no	1
Amorphophallus_konjac	SRX21783480	no	1
Amorphophallus_konjac	SRX21783484	no	0
Amorphophallus_muelleri	SRX21970661	no	0
Amsonia_hubrichtii	SRX096091	no	7
Anacardium_occidentale	SRR20532294	no	3
Anchomanes_difformis_var._welwitschii	SRX14865567	no	3
Anchomanes_hookeri	SRX14865568	no	3
Anchusa_officinalis	SRR11922382	no	5
Angelica_gigas	SRX22602457	no	5
Anisodus_tanguticus	SRR16071539	no	6
Annona_glabra	SRR18449566	no	0
Anthurium_andraeanum	SRX20376728	no	1
Anthurium_andraeanum	SRX20677006	no	0
Apocynum	SRR12321240	no	1
Apocynum_androsaemifolium	ERX2099592	no	2
Apocynum_hendersonii	SRR17165105	no	4
Apodytes_dimidiata	SRR12007206	no	1
Aponogeton_crispus	SRX15245086	no	0
Aquilaria_sinensis	SRR18552237	no	2
Aquilegia_vulgaris	SRR23342007	no	2
Arachis_hypogaea	SRX23336603	no	7
Aralia_elata	SRX22755127	no	1
Araucaria_araucana	SRX21651434	no	0
Arceuthobium_sichuanense	SRR3085214	no	0
Archidendron_clypearia	SRR13616542	no	3
Ardisia_crenata	SRR14875188	no	4
Ardisia_gigantifolia	SRR13009413	no	3
Ardisia_japonica	SRX21475195	no	4
Areca_catechu	SRR14064429	no	0
Areca_catechu	SRX19322014	no	0
Argyranthemum_broussonetii	SRR23434949	no	5
Arisaema_franchetianum	SRX14901152	no	1
Aristolochia_contorta	SRR12717589	no	0
Aristotelia_chilensis	SRR1519871	no	1
Arnebia_euchroma	SRR23196111	no	5
Artemisia_argyi	SRR14263046	no	4
Arum_maculatum	SRX16053784	no	0
Asarum_heterotropoides	SRR7448264	no	4
Asclepias_curassavica	ERX2099595	no	1
Asclepias_syriaca	ERX2099594	no	2
Asparagus_officinalis	SRX17208370	no	0
Astragalus_mongholicus	SRR15710062	no	5
Atalantia_buxifolia	SRR13481024	no	3
Atractylodes_macrocephala	SRR15435890	no	2
Atriplex_imbricata	SRR13316945	no	13
Atropa_belladonna	SRR21397101	no	3
Aucuba_japonica	SRR6374693	no	5
Avena_sativa	SRR22937056	no	0
Averrhoa_carambola	SRR19994629	no	1
Avicennia_marina	SRR13856180	no	2
Azadirachta_indica	SRR12709585	no	3
Barclaya_longifolia	SRR19978299	no	0
Barringtonia_racemosa	SRR18449567	no	3
Berberidopsis_beckleri	SRR11934225	no	4
Berberidopsis_corallina	SRR11934224	no	5
Berberis_amurensis	SRR20011669	no	0
Berzelia_albiflora	SRR12034804	no	3
Bletilla_striata	SRX19627363	no	0
Bombax_ceiba	SRR6470781	no	10
Borassus_flabellifer	SRX2988232	no	0
Borassus_flabellifer	SRX2988233	no	0
Bougainvillea_peruviana	SRR19962776	no	5
Bourreria_ovata	SRR12034773	no	3
Brasenia_schreberi	SRR10158517	no	0
Brassica_macrocarpa	SRR2296977	no	2
Brugmansia_arborea	SRR16074207	no	5
Bupleurum_chinense	SRR17234911	no	2
Bupleurum_scorzonerifolium	SRX18865872	no	17
Burmannia_biflora	SRR19179841	no	0
Butomus_sp._NYBG	SRX17620309	no	0
Buxus_sempervirens	SRR9304495	no	0
Cabomba_caroliniana	SRR6374696	no	0
Caladium	SRX17704581	no	0
Calamus_simplicifolius	SRX4341042	no	0
California_macrophylla	SRR1865112	no	0
Callisia_repens	SRX20229830	no	0
Calotropis_gigantea	SRR18138582	no	2
Camellia_azalea	SRX18322644	no	4
Camellia_crassicolumna	SRR20048849	no	5
Camellia_japonica	SRR22904724	no	2
Camellia_sinensis	SRX23208184	no	2
Camptotheca_acuminata	SRR19435325	no	3
Camptotheca_acuminata	SRR19435330	no	4
Capsella_rubella	SRR18361973	no	2
Caragana_liouana	SRR23621168	no	4
Carapichea_ipecacuanha	DRX341344	no	4
Cardamine_bellidifolia	SRR18573511	no	1
Cardamine_hupingshanensis	SRR14868894	no	1
Cardiocrinum_cathayanum	SRX5100138	no	0
Carex_pendula	ERX11656585	no	0
Carlephyton_glaucophyllum	SRX14887943	no	0
Carthamus_tinctorius	SRR12263769	no	1
Cassinopsis_ilicifolia	SRR12006304	no	1
Castanea_mollissima	SRR22978880	no	1
Casuarina_glauca	SRR5145649	no	7
Catharanthus_longifolius	SRX286029	no	4
Catharanthus_roseus	SRR21869223	no	4
Catharanthus_roseus	SRX17856391	no	2
Ceanothus_americanus	SRX15394148	no	6
Ceanothus_americanus	SRX15394149	no	10
Ceanothus_americanus	SRX15394150	no	13
Ceanothus_thyrsiflorus	SRR6384554	no	13
Celosia_cristata	SRX5870469	yes	12
Cenchrus_americanus	SRX9346665	no	0
Cenchrus_americanus	SRX9780281	no	2
Cephalotaxus_harringtonia	SRX19775921	no	1
Ceratophyllum_demersum	SRR9651191	no	0
Ceratozamia_decumbens	SRR23044173	no	0
Ceratozamia_kuesteriana	SRR23044197	no	0
Ceratozamia_robusta	SRR23044186	no	0
Ceropegia_sandersonii	SRX9551141	no	4
Champereia_manillana_var._longistaminea	SRR14148166	no	3
Chenopodium_quinoa	SRX22113561	no	3
Chiloglottis_trapeziformis	SRX9102852	no	0
Chimonanthus_praecox	SRR21031651	no	0
Chiococca_alba	SRX5862354	no	55
Chiococca_alba	SRX5862357	no	120
Chiococca_alba	SRR9087156	no	117
Chloranthus_sessilifolius	SRR15696159	no	0
Chorizanthe_commissuralis	SRR13316950	no	4
Cichorium_intybus	SRR17817357	no	8
Cinchona_calisaya	SRR1021741	no	38
Cinnamomum_camphora	SRR22558021	no	0
Cissus_quadrangularis	SRR5515077	no	3
Cissus_rotundifolia	SRR14598226	no	3
Citrullus_lanatus	SRR19582225	no	2
Citrus_junos	SRR16883166	no	7
Clematis_florida	SRR9690976	no	8
Clematis_florida	SRR9690979	no	0
Cleome_violacea	SRR22753232	no	1
Cnidium_officinale	SRX22240556	no	0
Cochlearia_groenlandica	SRR18573550	no	0
Codon_royenii	SRR12034792	no	1
Codon_schenckii	SRR12034788	no	2
Codonopsis_lanceolata	SRR18788705	no	9
Coelogyne_chinensis	SRR19440824	no	0
Coffea_arabica	SRX18488006	no	56
Coffea_arabica	SRX18488008	no	11
Coffea_canephora	SRX13836517	no	9
Coffea_eugenioides	SRX11917459	no	43
Coffea_humblotiana	SRR12792037	no	5
Coffea_liberica	SRR12034810	no	3
Coffea_pseudozanguebariae	SRX5974247	no	5
Columellia_oblonga_subsp._sericea	SRR11947069	no	1
Combretum_micranthum	SRR18449591	no	4
Conocarpus_erectus	SRR18449592	no	4
Cordia_borinquensis	SRR19237506	no	4
Coriaria_nepalensis	SRR22026041	no	2
Cornus_controversa	SRR8298298	no	4
Cornus_kousa	SRR12009663	no	1
Crawfurdia_angustata	SRX6591651	no	2
Crawfurdia_campanulacea	SRX6591650	no	2
Crawfurdia_gracilipes	SRX6591653	no	1
Crawfurdia_sp._Zhang_4665	SRX8542425	no	3
Crawfurdia_tsangshanensis	SRX6591652	no	3
Crocus_sativus	SRX21747813	no	0
Croomia_pauciflora	SRX15245092	no	0
Cryptomeria_japonica	DRX379845	no	0
Cucurbita_moschata	SRR19348765	no	5
Cunninghamia_lanceolata	SRX22368135	no	2
Curcuma_alismatifolia	SRR17783053	no	0
Curcuma_alismatifolia	SRX14840218	no	0
Curcuma_longa	SRX9049243	no	0
Curcuma_wenyujin	SRX7519077	no	0
Curtisia_dentata	SRR12007196	no	1
Cyanotis_arachnoidea	SRR7096764	no	0
Cyanotis_arachnoidea	SRX4025108	no	0
Cyanotis_arachnoidea	SRX4025109	no	0
Cycas_distans	SRX19222992	no	0
Cycas_edentata	SRX19222993	no	0
Cycas_revoluta	SRR5894355	no	0
Cyclocarya_paliurus	SRR17129369	no	3
Cymbidium_ensifolium	SRX12626589	no	0
Cynanchum_auriculatum	SRX6656752	no	5
Cynanchum_thesioides	SRX7242600	no	3
Cynanchum_wilfordii	SRR14996648	no	4
Cynoglossum_officinale	SRR7031350	no	14
Dendrobium_officinale	SRX20282507	no	0
Dendrocalamus_brandisii	SRX22720818	no	0
Dendrocnide_moroides	SRR9112680	no	3
Dendrolycopodium_obscurum	ERX337115	no	0
Deutzia_crenata	SRR12009653	no	6
Diervilla_sessilifolia	SRR14320402	no	1
Dillenia_indica	ERX2099247	no	2
Dillenia_suffruticosa	SRX21913882	no	3
Dillenia_suffruticosa	SRX21913883	no	3
Dillenia_suffruticosa	SRX21913890	no	6
Dioon_edule	SRR9282942	no	0
Dioon_edule	SRR9282943	no	0
Dioon_spinulosum	SRR15647527	no	0
Dioscorea_abyssinica	SRX5974254	no	0
Dioscorea_alata	SRX652438	no	0
Dioscorea_nipponica	SRX2745107	no	0
Dioscorea_oppositifolia	SRX18498838	no	0
Dioscorea_trifida	SRR9203062	no	0
Diospyros_kaki	SRR14018582	no	3
Diphasiastrum_digitatum	ERX2099929	no	0
Dirca_palustris	SRR22133644	no	2
Dracunculus_canariensis	SRX14901150	no	2
Dracunculus_vulgaris	SRX14901149	no	0
Dryobalanops_lanceolata	SRR19264920	no	4
Echinochloa_phyllopogon	DRX319495	no	1
Echium_wildpretii	SRR3654594	no	0
Ehretia_microphylla	SRR12009688	no	2
Elaeis_guineensis	SRR16944075	no	0
Elaeis_guineensis	SRX20871876	no	0
Elaeis_oleifera	ERX1484569	no	1
Elaeocarpus_glabripetalus	SRR6374698	no	9
Eleutherococcus_senticosus	SRX20489145	no	3
Elymus_sibiricus	SRX22478198	no	0
Emmenopterys_henryi	SRR9878962	no	19
Encephalartos_bubalinus	SRX19223024	no	1
Encephalartos_villosus	SRX19223025	no	0
Enhalus_acoroides	SRX16105760	no	0
Epipremnum_aureum	SRX15891780	no	5
Erigeron_breviscapus	SRR15182548	no	4
Eriodictyon_crassifolium	SRR12034791	no	2
Erodium_chrysanthum	SRR1855783	no	4
Erodium_foetidum	SRR1855173	no	3
Erycina_pusilla	SRX4512996	no	2
Erythranthe_verbenacea	SRX22489189	no	1
Erythroxylum_novogranatense	SRR15399168	no	2
Escallonia_rubra_var._macrantha	SRR12034796	no	1
Euclea_crispa	SRR12007200	no	3
Eucommia_ulmoides	SRR10854871	no	2
Eucommia_ulmoides	SRR15100428	no	3
Eugenia_stahlii	SRR19237512	no	1
Euonymus_carnosus	SRR6374701	no	4
Euonymus_europaeus	ERX11212475	no	3
Euryodendron_excelsum	SRR14278040	no	15
Eustoma_grandiflorum	SRX11624882	no	3
Eustoma_grandiflorum	SRX11624888	no	2
Euterpe_edulis	SRR22404875	no	1
Euterpe_edulis	SRX18374548	no	0
Exacum_affine	ERX2099599	no	8
Fagonia_chilensis	SRR13316938	no	5
Fagopyrum_tataricum	SRR19917225	no	2
Firmiana_danxiaensis	SRR1783601	no	1
Fragaria_x_ananassa	SRR21097028	no	7
Francoa_sonchifolia	SRR1863580	no	0
Fritillaria_taipaiensis	SRX22481956	no	0
Fritillaria_unibracteata	SRR15909831	no	0
Galium_aparine	SRX8025198	no	9
Galium_boreale	ERX2099605	no	3
Galium_mollugo	SRX8467360	no	3
Galium_tinctorium	SRX3526569	no	0
Galium_triflorum	SRX3526580	no	2
Garcinia_mangostana	SRR5904771	no	1
Gardenia_jasminoides	SRR19137756	no	60
Gardenia_jasminoides	SRX15204940	no	39
Garrya_elliptica	SRR12034769	no	3
Gastrodia_elata_f._glauca	SRX18085560	no	2
Gelsemium_elegans	SRX8542414	no	3
Gelsemium_rankinii	SRR12034816	no	3
Gelsemium_sempervirens	SRX5112810	no	6
Gentiana_cuneibarba	SRX6591648	no	2
Gentiana_macrophylla	SRR23107211	no	4
Gentiana_scabra	SRX6610707	no	3
Gentiana_squarrosa	SRX6610701	no	3
Gentiana_triflora	DRX204147	no	2
Gentiana_wilsonii	SRX6610708	no	0
Gentiana_yunnanensis	SRX6610709	no	1
Glehnia_littoralis	SRX22810758	no	2
Gloriosa_superba	SRX8394771	no	0
Glycine_max	SRX23153643	no	10
Glycyrrhiza_uralensis	SRR15505964	no	2
Gomphandra_tetrandra	SRR12009670	no	2
Gongronemopsis_tenacissima	SRX10364523	no	3
Gongronemopsis_tenacissima	SRX8677561	no	2
Gonocaryum_calleryanum	SRR12009643	no	4
Gonocaryum_lobbianum	SRR12009672	no	5
Gonzalagunia_spicata	SRX15298279	no	4
Grewia_asiatica	SRR9004648	no	5
Grona_styracifolia	SRR23592388	no	2
Gunnera_manicata	SRR9304498	no	0
Gymnema_sylvestre	SRX5865413	no	3
Gynochthodes_officinalis	SRR14070834	no	5
Gynostemma_pentaphyllum	SRR11747812	no	8
Halenia_elliptica	SRX3456241	no	8
Haloxylon_ammodendron	SRR18715547	no	8
Hamelia_patens	SRR12375046	no	5
Hanguana_malayana	SRR8674874	no	2
Hapaline_benthamiana	SRX14887972	no	0
Hedera_helix	ERX8976928	no	8
Hedychium_coronarium	SRX760173	no	0
Helianthus_tuberosus	SRR23004852	no	6
Heliotropium_corymbosum	SRR12034808	no	2
Heliotropium_spathulatum	SRR12034790	no	4
Helwingia_himalaica	SRR12009676	no	12
Helwingia_japonica	SRR11912453	no	8
Hemiphylacus_alatostylus	SRR19179836	no	0
Heritiera_littoralis	SRR18449616	no	0
Heritiera_littoralis	SRR5138318	no	1
Heritiera_parvifolia	SRR5138321	no	1
Hesperaloe_parviflora	SRX11805486	no	0
Hibbertia_grossulariifolia	ERX2099248	no	2
Hibiscus_cannabinus	SRR23032151	no	26
Hibiscus_mutabilis	SRR19078899	no	11
Hibiscus_syriacus	SRX2142890	no	32
Hoodia_gordonii	SRX047815	no	3
Hordeum_vulgare	SRX22579343	no	0
Hovenia_acerba	SRR5003663	no	8
Howea_belmoreana	SRX530202	no	0
Howea_belmoreana	SRX530225	no	0
Howea_forsteriana	SRX530242	no	0
Howea_forsteriana	SRX530244	no	0
Hoya_cagayanensis	SRX14280039	no	4
Hoya_coriacea	SRR18131961	no	4
Hoya_lacunosa	SRX14280040	no	3
Huperzia_lucidula	ERX2099921	no	0
Huperzia_selago	ERX2099925	no	0
Huperzia_serrata	SRX5211341	no	1
Hydrangea_paniculata	SRR22049137	no	1
Hydrophyllum_canadense	SRR12034817	no	3
Hypseocharis_bilobata	SRR1863177	no	9
Ilex_dabieshanensis	SRR22223855	no	4
Ilex_paraguariensis	SRR3584950	no	9
Ilex_purpurea	SRR6374705	no	2
Illicium_anisatum	SRR15358200	no	0
Impatiens_hawkeri	SRR14017730	no	1
Impatiens_walleriana	SRX22243179	no	2
Iodes_cirrhosa	SRR12009641	no	0
Ipomoea_aquatica	SRR18244697	no	3
Ipomoea_batatas	SRR19136367	no	1
Ipomoea_pes-caprae	SRR12461485	no	4
Iris_germanica	SRX11193683	no	3
Isatis_tinctoria	SRR7875289	no	0
Ixora_ferrea	SRX15298274	no	5
Jaltomata_yungayensis	SRR5380906	no	4
Japonolirion_osense	SRR19179853	no	0
Japonolirion_osense	SRX15245087	no	0
Juniperus_sabina	SRX20123730	no	0
Justicia_adhatoda	SRR19524218	no	3
Justicia_gendarussa	SRR7848077	no	5
Justicia_pacifica	SRR7806556	no	8
Justicia_procumbens	SRX9508901	no	6
Justicia_procumbens	SRR13060773	no	6
Kadsura_coccinea	SRR19631930	no	0
Kadsura_heteroclita	SRR11747019	no	1
Kandelia_obovata	SRR12158681	no	6
Kingia_australis	SRR8674873	no	0
Kosteletzkya_pentacarpos	SRR16370740	no	10
Krascheninnikovia_arborescens	SRR21095983	no	9
Kuepferia_decorata	SRX6610700	no	5
Kuepferia_otophora	SRX6610699	no	2
Lacandonia_schismatica	SRR19179849	no	0
Lacandonia_schismatica	SRX15245091	no	0
Lacmellea_panamensis	SRX1978192	no	4
Lappula_sessiliflora	SRR12034789	no	1
Lathyrus_sativus	SRR23266410	no	6
Lavandula_angustifolia	SRR23285923	no	8
Lemna_aequinoctialis	DRX276501	no	0
Lepidium_meyenii	SRR2922715	no	1
Ligusticum_chuanxiong	SRR17053252	no	8
Lilium	SRR17343927	no	0
Lilium_brownii	SRX19416983	no	0
Lilium_brownii_var._giganteum	SRX19319553	no	3
Linospadix_minor	SRX5562427	no	0
Linospadix_minor	SRX5562428	no	3
Linospadix_monostachyos	SRR8772279	no	1
Linospadix_monostachyos	SRX5562440	no	0
Linum_usitatissimum	SRR13619735	no	6
Litsea_citrata	SRR5560379	no	0
Loasa_tricolor	SRR12034807	no	10
Lolium_multiflorum	SRR23866840	no	0
Lomatogonium_longifolium	SRX6610706	no	3
Lonicera_caerulea	SRR6655863	no	2
Loranthus_tanakae	SRR11994214	no	0
Lotus_japonicus	DRX467371	no	5
Luculia_gratissima	SRR12328860	no	10
Luculia_yunnanensis	SRR17806413	no	5
Luffa_aegyptiaca	SRR14629994	no	6
Lycopodiella_appressa	ERX2099926	no	0
Lycopodium_deuterodensum	ERX2099927	no	0
Lysimachia_maritima	SRR19531555	no	3
Macrozamia_conferta	SRR18094542	no	0
Macrozamia_heteromera	SRR18094548	no	0
Macrozamia_lucida	SRR18094544	no	1
Magnolia_denudata	SRR13236443	no	0
Magnolia_maudiae	SRR8173855	no	0
Magnolia_sieboldii	SRR13626395	no	0
Magnolia_wufengensis	SRR13205886	no	0
Malania_oleifera	SRR7221534	no	2
Mandragora_caulescens	SRR22351885	no	2
Mappia_racemosa	SRR11994210	no	26
Megacodon_lushuiensis	SRX8297185	no	1
Melastoma_candidum	SRR11211559	no	2
Mentha_longifolia	SRR16953441	no	5
Mentzelia_decapetala	SRR12034778	no	2
Mentzelia_filifolia	SRR13912226	no	2
Merrilliodendron_megacarpum	SRR12006303	no	81
Metagentiana_rhodantha	SRX6610705	no	4
Metasequoia_glyptostroboides	SRX21168658	no	1
Mitragyna_speciosa	SRR12673042	no	13
Monotropa_uniflora	ERX2099552	no	11
Monotropa_uniflora	SRX8528010	no	19
Monsonia_emarginata	SRR1863176	no	6
Monsonia_marlothii	SRR1865384	no	2
Moricandia_suffruticosa	SRR12429696	no	0
Morinda_citrifolia	SRR18449576	no	2
Musa_acuminata_subsp._malaccensis	SRX20143107	no	0
Musa_acuminata_subsp._malaccensis	SRX20143108	no	0
Musa_troglodytarum	SRR16526573	no	0
Narcissus_tazetta	SRR19993647	no	0
Nardostachys_jatamansi	SRR20715437	no	14
Natsiatopsis_thunbergiifolia	SRR12009644	no	2
Nekemias_grossedentata	SRR14768758	no	4
Nemophila_menziesii	SRR11994230	no	0
Neolamarckia_cadamba	SRR1107781	no	2
Nerium_oleander	SRR15992315	no	5
Nitraria_sibirica	SRR22403920	no	2
Noccaea_caerulescens	SRR7271045	no	1
Nothapodytes_nimmoniana	SRR19262135	no	7
Nothapodytes_nimmoniana	SRR2310724	no	6
Nuphar_lutea	SRR10158662	no	0
Nymphaea_colorata	SRR13442878	no	1
Nymphaea_lotus	SRR21031423	no	0
Nymphaea_micrantha	SRR13442888	no	1
Nymphaea_thermarum	SRR8487544	no	0
Nyssa_sylvatica	SRR12034785	no	6
Ochetophila_trinervis	SRR5349278	no	9
Oenanthe_javanica	SRX20533258	no	5
Oenothera_harringtonii	SRR7773955	no	1
Oldenlandia_affinis	SRR7440026	no	4
Oldenlandia_corymbosa_var._corymbosa	ERX10607346	no	1
Olimarabidopsis_pumila	SRR14226822	no	0
Ophiorrhiza_pumila	DRX185191	no	3
Ophiorrhiza_pumila	SRR5007331	no	24
Opisthopappus_taihangensis	SRR21075417	no	4
Orinus_kokonoricus	SRX22604164	no	0
Orinus_kokonoricus	SRX22604204	no	0
Orychophragmus_diffusus	SRR6655830	no	2
Oryza_sativa	SRX22363289	no	0
Oryza_sativa_Japonica_Group	SRX17845680	no	0
Ottelia_acuminata	SRX17729219	no	0
Oxalis_corniculata	SRR6374686	no	3
Oxalis_stricta	SRR20016406	no	3
Palhinhaea_cernua	SRX2779509	no	0
Palicourea_croceoides	SRX15298275	no	42
Panax_ginseng	SRR22405152	no	11
Panax_notoginseng	SRX21937939	no	15
Panax_quinquefolius	SRR13447967	no	9
Pandanus_tectorius	SRR19179847	no	0
Pandanus_tectorius	SRX15245093	no	0
Panicum_virgatum	SRX21219437	no	1
Paris_polyphylla	SRX16749860	no	6
Parthenocissus_semicordata	SRR21846899	no	5
Pelargonium_graveolens	SRR21683597	no	3
Pelargonium_transvaalense	SRR1865111	no	2
Peltandra_virginica	SRX14887976	no	0
Periploca_sepium	SRX19911070	no	4
Persea_americana	SRR19240501	no	0
Persea_americana	SRR8926023	no	0
Phacelia_cf._hastata_Ma_L62	SRR12034782	no	1
Phacelia_pinnatifida	SRR13316944	no	1
Phalaenopsis_equestris	SRR22284832	no	1
Phaseolus_vulgaris	SRX22917487	no	1
Phelipanche_aegyptiaca	SRR23276752	no	5
Philadelphus_incanus	SRR6374685	no	1
Phlegmariurus_myrsinites	ERX2099923	no	0
Phlegmariurus_squarrosus	ERX337176	no	0
Phlegmariurus_tetrastichus	SRX10944034	no	0
Phoenix_dactylifera	SRX6851519	no	0
Phragmites_australis	SRX22258577	no	1
Phylloglossum_drummondii	ERX2099924	no	0
Picea_meyeri_var._mongolica	SRX20461667	no	0
Pinellia_ternata	SRX21882145	no	2
Pinellia_ternata	SRX22197535	no	4
Pinus_massoniana	SRX22366202	no	0
Pinus_thunbergii	DRX437894	no	0
Pinus_yunnanensis_var._pygmaea	SRX20314402	no	0
Piper_nigrum	SRR14876434	no	0
Pisum_sativum	SRX21919795	no	5
Pittosporopsis_kerrii	SRR12009645	no	1
Plantago_lanceolata	SRR13307825	no	2
Platanus_occidentalis	SRR342036	no	7
Platea_latifolia	SRR12009671	no	6
Platea_parvifolia	SRR12009691	no	2
Plumbago_zeylanica	SRR19261841	no	4
Poa_annua	SRR23604370	no	0
Polygonatum_cyrtonema	SRX21992567	no	0
Polyosma_cambodiana	SRR12009668	no	11
Polyspora_speciosa	SRX12885590	no	1
Pontederia_crassipes	SRX20811145	no	0
Pontederia_crassipes	SRX20811146	no	1
Pontederia_paniculata	SRX1555258	no	0
Pontederia_vaginalis	DRX296809	no	1
Portulaca_oleracea	SRR21372795	no	0
Posidonia_australis	SRX22022541	no	0
Potamogeton_sp._JHLM-2022	SRX15247741	no	0
Primula_vulgaris	ERX11733270	no	3
Prosopis_cineraria	SRR19213376	no	7
Psammosilene_tunicoides	SRR23615276	no	2
Pseudogalium_paradoxum	SRR21619438	no	0
Pseudolycopodiella_caroliniana	ERX337114	no	0
Pseudotsuga_menziesii	SRX19703325	no	0
Psychotria_costivenia	SRX4261237	no	2
Psychotria_deflexa	SRX15298263	no	15
Psychotria_gabriellae	SRR7388632	no	5
Psychotria_grandis	SRR7388640	no	4
Psychotria_marginata	ERX2099606	no	5
Psychotria_revoluta	SRR7388645	no	8
Psychotria_rubra	SRR15421042	no	2
Psychotria_semperflorens	SRR7388634	no	8
Pueraria_montana_var._lobata	SRX23148743	no	5
Pugionium_cornutum	SRR14552523	no	2
Pycnophyllum_bryoides	SRR13316961	no	8
Pyrenacantha_malvifolia	SRR11994211	no	21
Quararibea_asterolepis	SRR15016156	no	29
Quercus_ilex	SRR11050897	no	2
Quintinia_verdonii	SRR12007197	no	4
Ranalisma_rostratum	SRX19303244	no	0
Randia_armata	SRR15016244	no	23
Rauvolfia_serpentina	SRX096104	no	25
Rauvolfia_tetraphylla	SRX13337372	no	9
Rhamnella_rubrinervis	SRR9733465	no	19
Rhazya_stricta	SRX451090	no	3
Rheum_tanguticum	SRR14140285	no	2
Rhododendron_dauricum	SRX20942273	no	0
Rhododendron_irroratum	SRR23356328	no	3
Rhopalocnemis_phalloides	SRR14800310	no	0
Robinia_pseudoacacia	SRX23204745	no	4
Rubia_tinctorum	SRX8453011	no	3
Rubroshorea_curtisii	SRR16214518	no	2
Rumex_hastatulus	SRR11999010	no	2
Sabia_swinhoei	SRR17229682	no	1
Saccharum	SRR22018137	no	0
Sagittaria_latifolia	SRX15247742	no	0
Salvia_miltiorrhiza	SRR21619485	no	9
Salvia_yangii	SRR16508315	no	11
Santalum_album	SRR5150444	no	3
Saposhnikovia_divaricata	SRR22477893	no	1
Sarcandra_glabra	SRR12888158	no	0
Sassafras_albidum	SRR8298324	no	0
Sassafras_tzumu	SRR8298322	no	0
Sauromatum_giganteum	SRX14901251	no	0
Sauromatum_sp._JHLM-2021	SRX15245100	no	0
Sauromatum_venosum	SRX14901264	no	0
Scheuchzeria_palustris	SRX17620308	no	0
Schisandra_chinensis	SRR14695557	no	0
Schismatoglottis_neoguineensis	SRX14865572	no	4
Schoenoplectus_triqueter	ERX11656596	no	0
Scutellaria_baicalensis	SRR22680020	no	1
Scyphiphora_hydrophyllacea	SRR18449577	no	4
Secale_cereale	ERX11698112	no	0
Selenicereus_undatus	SRR19863829	no	7
Sesuvium_verrucosum	SRR15860165	no	19
Setaria_italica	ERX5508113	no	0
Setaria_italica	SRX11639135	no	0
Sicyos_edulis	SRR11573043	no	3
Sinogentiana_striata	SRX6610696	no	2
Siraitia_grosvenorii	SRR214337	no	3
Smallanthus_sonchifolius	SRR18215731	no	3
Smilax_rotundifolia	SRR6451340	no	0
Sonneratia_apetala	SRR3099211	no	3
Spathiphyllum_kochii	SRX16215461	no	3
Spigelia_splendens	SRR12034775	no	4
Spinulum_annotinum	ERX2099928	no	1
Spirodela_polyrhiza	SRX19507620	no	0
Spirodela_polyrhiza	SRX19507634	no	0
Squamellaria_imberbis	SRR14731637	no	11
Stachyurus_obovatus	SRR9671167	no	6
Stangeria_eriopus	SRR23044175	no	0
Sterculia_nobilis	SRR5138319	no	1
Steudnera_colocasiifolia	SRX14887974	no	0
Strelitzia_reginae	SRX5229646	no	2
Strychnos_nux-vomica	SRX14829254	no	5
Strychnos_sp._BH-2022a	SRX14875669	no	6
Strychnos_spinosa	ERX2099601	no	6
Stuckenia_pectinata	SRX20822892	no	0
Styrax_tonkinensis	SRR18356324	no	5
Swertia_bimaculata	SRX8542424	no	3
Swertia_cincta	SRX6610683	no	1
Swertia_emeiensis	SRX6610703	no	4
Swertia_japonica	SRX1688200	no	3
Swertia_macrosperma	SRX6610719	no	3
Swertia_mussotii	SRX1978998	no	1
Syngonium_erythrophyllum	SRX14887937	no	0
Syngonium_podophyllum	SRX14887939	no	2
Tabernaemontana_elegans	SRX096093	no	6
Tacca_chantrieri	SRR19179844	no	0
Talbotia_elegans	SRR19179852	no	0
Talipariti_hamabo	SRR15713046	no	18
Tapiscia_sinensis	SRR6926471	no	4
Taxillus_chinensis	SRR9266815	no	0
Tetracentron_sinense	SRR11566832	no	0
Tetraena_mongolica	SRR7820713	no	7
Thalia_dealbata	SRR23717304	no	0
Thesium_chinense	SRR5917894	no	4
Thlaspi_arvense	SRR802670	no	1
Thuja_plicata	SRX20253389	no	0
Thymus_mandschuricus	SRR23269176	no	3
Tilia_americana	SRR22133653	no	0
Tilia_cordata	SRR7943977	no	2
Torenia_fournieri	SRR23272310	no	2
Trachycarpus_fortunei	SRX19220160	no	0
Tradescantia_hirsutiflora	SRX7944589	no	0
Tradescantia_pallida	SRR8873503	no	2
Trapa_natans	SRR18449605	no	4
Tribulus_terrestris	SRR17194540	no	12
Tricalysia_congesta_subsp._congesta	SRR9203074	no	7
Trichilia_tuberculata	SRR15016169	no	3
Trichodesma_hildebrandtii	SRR12034787	no	3
Tricyrtis_formosana	DRX468043	no	0
Trifolium_ambiguum	SRR22514172	no	9
Trigonella_foenum-graecum	SRR14721913	no	9
Tripterospermum_cordatum	SRX6610704	no	7
Tripterospermum_membranaceum	SRX6610682	no	5
Tripterospermum_sp._Zhang_4686	SRX8542383	no	5
Tripterospermum_volubile	SRX6610681	no	6
Tripterygium_regelii	SRR3583049	no	6
Tripterygium_wilfordii	SRR12059214	no	6
Tripterygium_wilfordii	SRR12059217	no	10
Trithuria_bibracteata	SRR12832745	no	0
Trochodendron_aralioides	SRR9304497	no	0
Tulipa_gesneriana	SRX10168880	no	0
Tulipa_gesneriana	SRX10168885	no	0
Typhonium_roxburghii	SRX14901151	no	0
Typhonodorum_sp._LZ-2022a	SRX14887971	no	1
Ulearum_donburnsii	SRX14865580	no	0
Uncaria_rhynchophylla	SRR17387612	no	7
Vaccinium_corymbosum	SRX22201388	no	6
Vahlia_capensis	SRR11994212	no	4
Vanilla_planifolia	SRX11714029	no	0
Vanilla_planifolia	SRX11714032	no	0
Veratrilla_baillonii	SRX1032805	no	3
Veratrum_album	SRR11487678	no	0
Veratrum_nigrum	SRX18834080	no	1
Victoria_cruziana	SRR10158663	no	0
Vigna_radiata	SRX22832437	no	3
Vinca_minor	ERX4622435	no	6
Vincetoxicum_mongolicum	SRX1550132	no	5
Vincetoxicum_versicolor	SRX7509866	no	1
Viscum_album	SRR5724712	no	0
Viscum_coloratum	SRR4473609	no	0
Vitis_rotundifolia	SRR19309443	no	1
Voacanga_thouarsii	SRX16015266	no	5
Warburgia_ugandensis	SRR1942955	no	0
Weigela_florida	SRR12009640	no	2
Wigandia_ecuadorensis	SRR12034818	no	3
Wolffia_australiana	SRX11059636	no	0
Wrightia_natalensis	ERX2099596	no	5
Wrightia_religiosa	SRX357357	no	0
Wurfbainia_villosa	SRX4092621	no	0
Xanthosoma_brasiliense	SRX14887969	no	0
Xenostegia_tridentata	SRR12009667	no	1
Xerophyta_humilis	SRX5146320	no	0
Xerophyta_humilis	SRX5146340	no	0
Xiphidium_caeruleum	SRR19182622	no	0
Xylocarpus_granatum	SRR18449620	no	5
Yua_thomsonii	SRR21846904	no	4
Yucca_gloriosa	SRX3607158	no	0
Zantedeschia_aethiopica	SRR18766085	no	0
Zantedeschia_hybrid_cultivar	SRX20069260	no	7
Zantedeschia_hybrid_cultivar	SRX20069267	no	4
Zataria_multiflora	SRR12769236	no	2
Zea_mays	SRX19444804	no	0
Zea_mays	SRX21931650	no	1
Zingiber_nudicarpum	SRX13980730	no	2
Zingiber_officinale	SRX18179755	no	0
Zingiber_officinale	SRX18179756	no	0
Ziziphus_acidojujuba	SRX12909844	no	61
Ziziphus_jujuba_var._spinosa	SRX19499644	no	16
Ziziphus_nummularia	SRR2058069	no	23
Ziziphus_spina-christi	SRX19499651	no	42
Zostera_marina	SRX19556940	no	0
Zostera_marina	SRX20162190	no	0
Zygophyllum_xanthoxylum	SRR22350214	no	2

## Sheet: TreeAvg
ID	SRA_#	Known or New Burpitide producer	Numer of Precursor Peptides
Abelmoschus_manihot	SRR17184302	no	9
Abies_koreana	SRX20999648	no	0
Acer_fabri	SRR23679478	no	2
Acer_saccharum	SRR22133662	no	1
Acorus_calamus	SRR8298303	no	1
Acorus_calamus_var._americanus	SRR8674871	no	0
Acorus_gramineus	SRX20117617	no	1
Acrocomia_aculeata	SRX4673740	no	0
Actinidia_chinensis	SRX23021710	no	1
Actinidia_deliciosa	SRR21800379	no	2
Aganosma_wallichii	SRR12990042	no	2
Aglaonema_modestum	SRX14865569	no	1
Aglaonema_nitidum	SRX14865571	no	1
Ailanthus_altissimus	SRR19346871	no	18
Akebia_sp.	SRR20301824	no	0
Alangium_chinense	SRR12009661	no	3
Albizia_julibrissin	SRX6901075	no	12
Aletris_farinosa	SRR19179843	no	1
Alisma_plantago-aquatica	ERX11418699	no	0
Allionia_incarnata	SRR13316968	no	7
Allium_cepa	SRX17790828	no	0
Alocasia_odora	SRX18381545	no	0
Aloe_vera	SRX8420625	no	0
Alpinia_mutica	SRX21505581	no	0
Alpinia_oxyphylla	SRX6686134	no	0
Alstonia_scholaris	SRX13827122	no	6
Alternanthera_bettzickiana	SRR15506171	no	31
Althaea_officinalis	SRR23908484	no	7
Amaranthus_tricolor	SRX11406718	no	5
Amborella_trichopoda	SRR9087794	no	0
Ammopiptanthus_nanus	SRR23694546	no	1
Amorphophallus_konjac	SRX21783480	no	1
Amorphophallus_muelleri	SRX21970661	no	0
Amsonia_hubrichtii	SRX096091	no	7
Anacardium_occidentale	SRR20532294	no	3
Anchomanes_difformis_var._welwitschii	SRX14865567	no	3
Anchomanes_hookeri	SRX14865568	no	3
Anchusa_officinalis	SRR11922382	no	5
Angelica_gigas	SRX22602457	no	5
Anisodus_tanguticus	SRR16071539	no	6
Annona_glabra	SRR18449566	no	0
Anthurium_andraeanum	SRX20376728	no	1
Apocynum	SRR12321240	no	1
Apocynum_androsaemifolium	ERX2099592	no	2
Apocynum_hendersonii	SRR17165105	no	4
Apodytes_dimidiata	SRR12007206	no	1
Aponogeton_crispus	SRX15245086	no	0
Aquilaria_sinensis	SRR18552237	no	2
Aquilegia_vulgaris	SRR23342007	no	2
Arachis_hypogaea	SRX23336603	no	7
Aralia_elata	SRX22755127	no	1
Araucaria_araucana	SRX21651434	no	0
Arceuthobium_sichuanense	SRR3085214	no	0
Archidendron_clypearia	SRR13616542	no	3
Ardisia_crenata	SRR14875188	no	4
Ardisia_gigantifolia	SRR13009413	no	3
Ardisia_japonica	SRX21475195	no	4
Areca_catechu	SRR14064429	no	0
Argyranthemum_broussonetii	SRR23434949	no	5
Arisaema_franchetianum	SRX14901152	no	1
Aristolochia_contorta	SRR12717589	no	0
Aristotelia_chilensis	SRR1519871	no	1
Arnebia_euchroma	SRR23196111	no	5
Artemisia_argyi	SRR14263046	no	4
Arum_maculatum	SRX16053784	no	0
Asarum_heterotropoides	SRR7448264	no	4
Asclepias_curassavica	ERX2099595	no	1
Asclepias_syriaca	ERX2099594	no	2
Asparagus_officinalis	SRX17208370	no	0
Astragalus_mongholicus	SRR15710062	no	5
Atalantia_buxifolia	SRR13481024	no	3
Atractylodes_macrocephala	SRR15435890	no	2
Atriplex_imbricata	SRR13316945	no	13
Atropa_belladonna	SRR21397101	no	3
Aucuba_japonica	SRR6374693	no	5
Avena_sativa	SRR22937056	no	0
Averrhoa_carambola	SRR19994629	no	1
Avicennia_marina	SRR13856180	no	2
Azadirachta_indica	SRR12709585	no	3
Barclaya_longifolia	SRR19978299	no	0
Barringtonia_racemosa	SRR18449567	no	3
Berberidopsis_beckleri	SRR11934225	no	4
Berberidopsis_corallina	SRR11934224	no	5
Berberis_amurensis	SRR20011669	no	0
Berzelia_albiflora	SRR12034804	no	3
Bletilla_striata	SRX19627363	no	0
Bombax_ceiba	SRR6470781	no	10
Borassus_flabellifer	SRX2988232	no	0
Bougainvillea_peruviana	SRR19962776	no	5
Bourreria_ovata	SRR12034773	no	3
Brasenia_schreberi	SRR10158517	no	0
Brassica_macrocarpa	SRR2296977	no	2
Brugmansia_arborea	SRR16074207	no	5
Bupleurum_chinense	SRR17234911	no	2
Bupleurum_scorzonerifolium	SRX18865872	no	17
Burmannia_biflora	SRR19179841	no	0
Butomus_sp._NYBG	SRX17620309	no	0
Buxus_sempervirens	SRR9304495	no	0
Cabomba_caroliniana	SRR6374696	no	0
Caladium	SRX17704581	no	0
Calamus_simplicifolius	SRX4341042	no	0
California_macrophylla	SRR1865112	no	0
Callisia_repens	SRX20229830	no	0
Calotropis_gigantea	SRR18138582	no	2
Camellia_azalea	SRX18322644	no	4
Camellia_crassicolumna	SRR20048849	no	5
Camellia_japonica	SRR22904724	no	2
Camellia_sinensis	SRX23208184	no	2
Camptotheca_acuminata	SRR19435325	no	4
Capsella_rubella	SRR18361973	no	2
Caragana_liouana	SRR23621168	no	4
Carapichea_ipecacuanha	DRX341344	no	4
Cardamine_bellidifolia	SRR18573511	no	1
Cardamine_hupingshanensis	SRR14868894	no	1
Cardiocrinum_cathayanum	SRX5100138	no	0
Carex_pendula	ERX11656585	no	0
Carlephyton_glaucophyllum	SRX14887943	no	0
Carthamus_tinctorius	SRR12263769	no	1
Cassinopsis_ilicifolia	SRR12006304	no	1
Castanea_mollissima	SRR22978880	no	1
Casuarina_glauca	SRR5145649	no	7
Catharanthus_longifolius	SRX286029	no	4
Catharanthus_roseus	SRR21869223	no	3
Ceanothus_americanus	SRX15394148	yes	10
Ceanothus_thyrsiflorus	SRR6384554	no	13
Celosia_cristata	SRX5870469	yes	12
Cenchrus_americanus	SRX9346665	no	1
Cephalotaxus_harringtonia	SRX19775921	no	1
Ceratophyllum_demersum	SRR9651191	no	0
Ceratozamia_decumbens	SRR23044173	no	0
Ceratozamia_kuesteriana	SRR23044197	no	0
Ceratozamia_robusta	SRR23044186	no	0
Ceropegia_sandersonii	SRX9551141	no	4
Champereia_manillana_var._longistaminea	SRR14148166	no	3
Chenopodium_quinoa	SRX22113561	no	3
Chiloglottis_trapeziformis	SRX9102852	no	0
Chimonanthus_praecox	SRR21031651	no	0
Chiococca_alba	SRX5862354	no	98
Chloranthus_sessilifolius	SRR15696159	no	0
Chorizanthe_commissuralis	SRR13316950	no	4
Cichorium_intybus	SRR17817357	no	8
Cinchona_calisaya	SRR1021741	no	38
Cinnamomum_camphora	SRR22558021	no	0
Cissus_quadrangularis	SRR5515077	no	3
Cissus_rotundifolia	SRR14598226	no	3
Citrullus_lanatus	SRR19582225	no	2
Citrus_junos	SRR16883166	no	7
Clematis_florida	SRR9690976	no	4
Cleome_violacea	SRR22753232	no	1
Cnidium_officinale	SRX22240556	no	0
Cochlearia_groenlandica	SRR18573550	no	0
Codon_royenii	SRR12034792	no	1
Codon_schenckii	SRR12034788	no	2
Codonopsis_lanceolata	SRR18788705	no	9
Coelogyne_chinensis	SRR19440824	no	0
Coffea_arabica	SRX18488006	no	34
Coffea_canephora	SRX13836517	no	9
Coffea_eugenioides	SRX11917459	no	43
Coffea_humblotiana	SRR12792037	no	5
Coffea_liberica	SRR12034810	no	3
Coffea_pseudozanguebariae	SRX5974247	no	5
Columellia_oblonga_subsp._sericea	SRR11947069	no	1
Combretum_micranthum	SRR18449591	no	4
Conocarpus_erectus	SRR18449592	no	4
Cordia_borinquensis	SRR19237506	no	4
Coriaria_nepalensis	SRR22026041	no	2
Cornus_controversa	SRR8298298	no	4
Cornus_kousa	SRR12009663	no	1
Crawfurdia_angustata	SRX6591651	no	2
Crawfurdia_campanulacea	SRX6591650	no	2
Crawfurdia_gracilipes	SRX6591653	no	1
Crawfurdia_sp._Zhang_4665	SRX8542425	no	3
Crawfurdia_tsangshanensis	SRX6591652	no	3
Crocus_sativus	SRX21747813	no	0
Croomia_pauciflora	SRX15245092	no	0
Cryptomeria_japonica	DRX379845	no	0
Cucurbita_moschata	SRR19348765	no	5
Cunninghamia_lanceolata	SRX22368135	no	2
Curcuma_alismatifolia	SRR17783053	no	0
Curcuma_longa	SRX9049243	no	0
Curcuma_wenyujin	SRX7519077	no	0
Curtisia_dentata	SRR12007196	no	1
Cyanotis_arachnoidea	SRR7096764	no	0
Cycas_distans	SRX19222992	no	0
Cycas_edentata	SRX19222993	no	0
Cycas_revoluta	SRR5894355	no	0
Cyclocarya_paliurus	SRR17129369	no	3
Cymbidium_ensifolium	SRX12626589	no	0
Cynanchum_auriculatum	SRX6656752	no	5
Cynanchum_thesioides	SRX7242600	no	3
Cynanchum_wilfordii	SRR14996648	no	4
Cynoglossum_officinale	SRR7031350	no	14
Dendrobium_officinale	SRX20282507	no	0
Dendrocalamus_brandisii	SRX22720818	no	0
Dendrocnide_moroides	SRR9112680	yes	3
Dendrolycopodium_obscurum	ERX337115	no	0
Deutzia_crenata	SRR12009653	no	6
Diervilla_sessilifolia	SRR14320402	no	1
Dillenia_indica	ERX2099247	no	2
Dillenia_suffruticosa	SRX21913882	no	4
Dioon_edule	SRR9282942	no	0
Dioon_spinulosum	SRR15647527	no	0
Dioscorea_abyssinica	SRX5974254	no	0
Dioscorea_alata	SRX652438	no	0
Dioscorea_nipponica	SRX2745107	no	0
Dioscorea_oppositifolia	SRX18498838	no	0
Dioscorea_trifida	SRR9203062	no	0
Diospyros_kaki	SRR14018582	no	3
Diphasiastrum_digitatum	ERX2099929	no	0
Dirca_palustris	SRR22133644	no	2
Dracunculus_canariensis	SRX14901150	no	2
Dracunculus_vulgaris	SRX14901149	no	0
Dryobalanops_lanceolata	SRR19264920	no	4
Echinochloa_phyllopogon	DRX319495	no	1
Echium_wildpretii	SRR3654594	no	0
Ehretia_microphylla	SRR12009688	no	2
Elaeis_guineensis	SRR16944075	no	0
Elaeis_oleifera	ERX1484569	no	1
Elaeocarpus_glabripetalus	SRR6374698	no	9
Eleutherococcus_senticosus	SRX20489145	no	3
Elymus_sibiricus	SRX22478198	no	0
Emmenopterys_henryi	SRR9878962	no	19
Encephalartos_bubalinus	SRX19223024	no	1
Encephalartos_villosus	SRX19223025	no	0
Enhalus_acoroides	SRX16105760	no	0
Epipremnum_aureum	SRX15891780	no	5
Erigeron_breviscapus	SRR15182548	no	4
Eriodictyon_crassifolium	SRR12034791	no	2
Erodium_chrysanthum	SRR1855783	no	4
Erodium_foetidum	SRR1855173	no	3
Erycina_pusilla	SRX4512996	no	2
Erythranthe_verbenacea	SRX22489189	no	1
Erythroxylum_novogranatense	SRR15399168	no	2
Escallonia_rubra_var._macrantha	SRR12034796	no	1
Euclea_crispa	SRR12007200	no	3
Eucommia_ulmoides	SRR10854871	no	3
Eugenia_stahlii	SRR19237512	no	1
Euonymus_carnosus	SRR6374701	no	4
Euonymus_europaeus	ERX11212475	no	3
Euryodendron_excelsum	SRR14278040	no	15
Eustoma_grandiflorum	SRX11624882	no	3
Euterpe_edulis	SRR22404875	no	1
Exacum_affine	ERX2099599	no	8
Fagonia_chilensis	SRR13316938	no	5
Fagopyrum_tataricum	SRR19917225	no	2
Firmiana_danxiaensis	SRR1783601	no	1
Fragaria_x_ananassa	SRR21097028	no	7
Francoa_sonchifolia	SRR1863580	no	0
Fritillaria_taipaiensis	SRX22481956	no	0
Fritillaria_unibracteata	SRR15909831	no	0
Galium_aparine	SRX8025198	no	9
Galium_boreale	ERX2099605	no	3
Galium_mollugo	SRX8467360	no	3
Galium_tinctorium	SRX3526569	no	0
Galium_triflorum	SRX3526580	no	2
Garcinia_mangostana	SRR5904771	no	1
Gardenia_jasminoides	SRR19137756	no	50
Garrya_elliptica	SRR12034769	no	3
Gastrodia_elata_f._glauca	SRX18085560	no	2
Gelsemium_elegans	SRX8542414	no	3
Gelsemium_rankinii	SRR12034816	no	3
Gelsemium_sempervirens	SRX5112810	no	6
Gentiana_cuneibarba	SRX6591648	no	2
Gentiana_macrophylla	SRR23107211	no	4
Gentiana_scabra	SRX6610707	no	3
Gentiana_squarrosa	SRX6610701	no	3
Gentiana_triflora	DRX204147	no	2
Gentiana_wilsonii	SRX6610708	no	0
Gentiana_yunnanensis	SRX6610709	no	1
Glehnia_littoralis	SRX22810758	no	2
Gloriosa_superba	SRX8394771	no	0
Glycine_max	SRX23153643	no	10
Glycyrrhiza_uralensis	SRR15505964	no	2
Gomphandra_tetrandra	SRR12009670	no	2
Gongronemopsis_tenacissima	SRX10364523	no	3
Gonocaryum_calleryanum	SRR12009643	no	4
Gonocaryum_lobbianum	SRR12009672	no	5
Gonzalagunia_spicata	SRX15298279	no	4
Grewia_asiatica	SRR9004648	no	5
Grona_styracifolia	SRR23592388	no	2
Gunnera_manicata	SRR9304498	no	0
Gymnema_sylvestre	SRX5865413	no	3
Gynochthodes_officinalis	SRR14070834	no	5
Gynostemma_pentaphyllum	SRR11747812	no	8
Halenia_elliptica	SRX3456241	no	8
Haloxylon_ammodendron	SRR18715547	no	8
Hamelia_patens	SRR12375046	no	5
Hanguana_malayana	SRR8674874	no	2
Hapaline_benthamiana	SRX14887972	no	0
Hedera_helix	ERX8976928	no	8
Hedychium_coronarium	SRX760173	no	0
Helianthus_tuberosus	SRR23004852	no	6
Heliotropium_corymbosum	SRR12034808	no	2
Heliotropium_spathulatum	SRR12034790	no	4
Helwingia_himalaica	SRR12009676	no	12
Helwingia_japonica	SRR11912453	no	8
Hemiphylacus_alatostylus	SRR19179836	no	0
Heritiera_littoralis	SRR18449616	no	1
Heritiera_parvifolia	SRR5138321	no	1
Hesperaloe_parviflora	SRX11805486	no	0
Hibbertia_grossulariifolia	ERX2099248	no	2
Hibiscus_cannabinus	SRR23032151	no	26
Hibiscus_mutabilis	SRR19078899	no	11
Hibiscus_syriacus	SRX2142890	no	32
Hoodia_gordonii	SRX047815	no	3
Hordeum_vulgare	SRX22579343	no	0
Hovenia_acerba	SRR5003663	no	8
Howea_belmoreana	SRX530202	no	0
Howea_forsteriana	SRX530242	no	0
Hoya_cagayanensis	SRX14280039	no	4
Hoya_coriacea	SRR18131961	no	4
Hoya_lacunosa	SRX14280040	no	3
Huperzia_lucidula	ERX2099921	no	0
Huperzia_selago	ERX2099925	no	0
Huperzia_serrata	SRX5211341	no	1
Hydrangea_paniculata	SRR22049137	no	1
Hydrophyllum_canadense	SRR12034817	no	3
Hypseocharis_bilobata	SRR1863177	no	9
Ilex_dabieshanensis	SRR22223855	no	4
Ilex_paraguariensis	SRR3584950	no	9
Ilex_purpurea	SRR6374705	no	2
Illicium_anisatum	SRR15358200	no	0
Impatiens_hawkeri	SRR14017730	no	1
Impatiens_walleriana	SRX22243179	no	2
Iodes_cirrhosa	SRR12009641	no	0
Ipomoea_aquatica	SRR18244697	no	3
Ipomoea_batatas	SRR19136367	no	1
Ipomoea_pes-caprae	SRR12461485	no	4
Iris_germanica	SRX11193683	no	3
Isatis_tinctoria	SRR7875289	no	0
Ixora_ferrea	SRX15298274	no	5
Jaltomata_yungayensis	SRR5380906	no	4
Japonolirion_osense	SRR19179853	no	0
Juniperus_sabina	SRX20123730	no	0
Justicia_adhatoda	SRR19524218	no	3
Justicia_gendarussa	SRR7848077	no	5
Justicia_pacifica	SRR7806556	no	8
Justicia_procumbens	SRX9508901	no	6
Kadsura_coccinea	SRR19631930	no	0
Kadsura_heteroclita	SRR11747019	no	1
Kandelia_obovata	SRR12158681	no	6
Kingia_australis	SRR8674873	no	0
Kosteletzkya_pentacarpos	SRR16370740	no	10
Krascheninnikovia_arborescens	SRR21095983	no	9
Kuepferia_decorata	SRX6610700	no	5
Kuepferia_otophora	SRX6610699	no	2
Lacandonia_schismatica	SRR19179849	no	0
Lacmellea_panamensis	SRX1978192	no	4
Lappula_sessiliflora	SRR12034789	no	1
Lathyrus_sativus	SRR23266410	no	6
Lavandula_angustifolia	SRR23285923	no	8
Lemna_aequinoctialis	DRX276501	no	0
Lepidium_meyenii	SRR2922715	no	1
Ligusticum_chuanxiong	SRR17053252	no	8
Lilium	SRR17343927	no	0
Lilium_brownii	SRX19416983	no	0
Lilium_brownii_var._giganteum	SRX19319553	no	3
Linospadix_minor	SRX5562427	no	2
Linospadix_monostachyos	SRR8772279	no	1
Linum_usitatissimum	SRR13619735	no	6
Litsea_citrata	SRR5560379	no	0
Loasa_tricolor	SRR12034807	no	10
Lolium_multiflorum	SRR23866840	no	0
Lomatogonium_longifolium	SRX6610706	no	3
Lonicera_caerulea	SRR6655863	no	2
Loranthus_tanakae	SRR11994214	no	0
Lotus_japonicus	DRX467371	no	5
Luculia_gratissima	SRR12328860	no	10
Luculia_yunnanensis	SRR17806413	no	5
Luffa_aegyptiaca	SRR14629994	no	6
Lycopodiella_appressa	ERX2099926	no	0
Lycopodium_deuterodensum	ERX2099927	no	0
Lysimachia_maritima	SRR19531555	no	3
Macrozamia_conferta	SRR18094542	no	0
Macrozamia_heteromera	SRR18094548	no	0
Macrozamia_lucida	SRR18094544	no	1
Magnolia_denudata	SRR13236443	no	0
Magnolia_maudiae	SRR8173855	no	0
Magnolia_sieboldii	SRR13626395	no	0
Magnolia_wufengensis	SRR13205886	no	0
Malania_oleifera	SRR7221534	no	2
Mandragora_caulescens	SRR22351885	no	2
Mappia_racemosa	SRR11994210	no	26
Megacodon_lushuiensis	SRX8297185	no	1
Melastoma_candidum	SRR11211559	no	2
Mentha_longifolia	SRR16953441	no	5
Mentzelia_decapetala	SRR12034778	no	2
Mentzelia_filifolia	SRR13912226	no	2
Merrilliodendron_megacarpum	SRR12006303	no	81
Metagentiana_rhodantha	SRX6610705	no	4
Metasequoia_glyptostroboides	SRX21168658	no	1
Mitragyna_speciosa	SRR12673042	no	13
Monotropa_uniflora	ERX2099552	no	15
Monsonia_emarginata	SRR1863176	no	6
Monsonia_marlothii	SRR1865384	no	2
Moricandia_suffruticosa	SRR12429696	no	0
Morinda_citrifolia	SRR18449576	no	2
Musa_acuminata_subsp._malaccensis	SRX20143107	no	0
Musa_troglodytarum	SRR16526573	no	0
Narcissus_tazetta	SRR19993647	no	0
Nardostachys_jatamansi	SRR20715437	no	14
Natsiatopsis_thunbergiifolia	SRR12009644	no	2
Nekemias_grossedentata	SRR14768758	no	4
Nemophila_menziesii	SRR11994230	no	0
Neolamarckia_cadamba	SRR1107781	no	2
Nerium_oleander	SRR15992315	no	5
Nitraria_sibirica	SRR22403920	no	2
Noccaea_caerulescens	SRR7271045	no	1
Nothapodytes_nimmoniana	SRR19262135	no	7
Nuphar_lutea	SRR10158662	no	0
Nymphaea_colorata	SRR13442878	no	1
Nymphaea_lotus	SRR21031423	no	0
Nymphaea_micrantha	SRR13442888	no	1
Nymphaea_thermarum	SRR8487544	no	0
Nyssa_sylvatica	SRR12034785	no	6
Ochetophila_trinervis	SRR5349278	no	9
Oenanthe_javanica	SRX20533258	no	5
Oenothera_harringtonii	SRR7773955	no	1
Oldenlandia_affinis	SRR7440026	no	4
Oldenlandia_corymbosa_var._corymbosa	ERX10607346	no	1
Olimarabidopsis_pumila	SRR14226822	no	0
Ophiorrhiza_pumila	SRR5007331	no	14
Opisthopappus_taihangensis	SRR21075417	no	4
Orinus_kokonoricus	SRX22604164	no	0
Orychophragmus_diffusus	SRR6655830	no	2
Oryza_sativa	SRX22363289	no	0
Oryza_sativa_Japonica_Group	SRX17845680	no	0
Ottelia_acuminata	SRX17729219	no	0
Oxalis_corniculata	SRR6374686	no	3
Oxalis_stricta	SRR20016406	no	3
Palhinhaea_cernua	SRX2779509	no	0
Palicourea_croceoides	SRX15298275	no	42
Panax_ginseng	SRR22405152	no	11
Panax_notoginseng	SRX21937939	no	15
Panax_quinquefolius	SRR13447967	no	9
Pandanus_tectorius	SRR19179847	no	0
Panicum_virgatum	SRX21219437	no	1
Paris_polyphylla	SRX16749860	no	6
Parthenocissus_semicordata	SRR21846899	no	5
Pelargonium_graveolens	SRR21683597	no	3
Pelargonium_transvaalense	SRR1865111	no	2
Peltandra_virginica	SRX14887976	no	0
Periploca_sepium	SRX19911070	no	4
Persea_americana	SRR19240501	no	0
Phacelia_cf._hastata_Ma_L62	SRR12034782	no	1
Phacelia_pinnatifida	SRR13316944	no	1
Phalaenopsis_equestris	SRR22284832	no	1
Phaseolus_vulgaris	SRX22917487	no	1
Phelipanche_aegyptiaca	SRR23276752	no	5
Philadelphus_incanus	SRR6374685	no	1
Phlegmariurus_myrsinites	ERX2099923	no	0
Phlegmariurus_squarrosus	ERX337176	no	0
Phlegmariurus_tetrastichus	SRX10944034	no	0
Phoenix_dactylifera	SRX6851519	no	0
Phragmites_australis	SRX22258577	no	1
Phylloglossum_drummondii	ERX2099924	no	0
Picea_meyeri_var._mongolica	SRX20461667	no	0
Pinellia_ternata	SRX21882145	no	3
Pinus_massoniana	SRX22366202	no	0
Pinus_thunbergii	DRX437894	no	0
Pinus_yunnanensis_var._pygmaea	SRX20314402	no	0
Piper_nigrum	SRR14876434	no	0
Pisum_sativum	SRX21919795	no	5
Pittosporopsis_kerrii	SRR12009645	no	1
Plantago_lanceolata	SRR13307825	no	2
Platanus_occidentalis	SRR342036	no	7
Platea_latifolia	SRR12009671	no	6
Platea_parvifolia	SRR12009691	no	2
Plumbago_zeylanica	SRR19261841	no	4
Poa_annua	SRR23604370	no	0
Polygonatum_cyrtonema	SRX21992567	no	0
Polyosma_cambodiana	SRR12009668	no	11
Polyspora_speciosa	SRX12885590	no	1
Pontederia_crassipes	SRX20811145	no	1
Pontederia_paniculata	SRX1555258	no	0
Pontederia_vaginalis	DRX296809	no	1
Portulaca_oleracea	SRR21372795	no	0
Posidonia_australis	SRX22022541	no	0
Potamogeton_sp._JHLM-2022	SRX15247741	no	0
Primula_vulgaris	ERX11733270	no	3
Prosopis_cineraria	SRR19213376	no	7
Psammosilene_tunicoides	SRR23615276	no	2
Pseudogalium_paradoxum	SRR21619438	no	0
Pseudolycopodiella_caroliniana	ERX337114	no	0
Pseudotsuga_menziesii	SRX19703325	no	0
Psychotria_costivenia	SRX4261237	no	2
Psychotria_deflexa	SRX15298263	no	15
Psychotria_gabriellae	SRR7388632	no	5
Psychotria_grandis	SRR7388640	no	4
Psychotria_marginata	ERX2099606	no	5
Psychotria_revoluta	SRR7388645	no	8
Psychotria_rubra	SRR15421042	no	2
Psychotria_semperflorens	SRR7388634	no	8
Pueraria_montana_var._lobata	SRX23148743	no	5
Pugionium_cornutum	SRR14552523	no	2
Pycnophyllum_bryoides	SRR13316961	no	8
Pyrenacantha_malvifolia	SRR11994211	no	21
Quararibea_asterolepis	SRR15016156	no	29
Quercus_ilex	SRR11050897	no	2
Quintinia_verdonii	SRR12007197	no	4
Ranalisma_rostratum	SRX19303244	no	0
Randia_armata	SRR15016244	no	23
Rauvolfia_serpentina	SRX096104	no	25
Rauvolfia_tetraphylla	SRX13337372	no	9
Rhamnella_rubrinervis	SRR9733465	no	19
Rhazya_stricta	SRX451090	no	3
Rheum_tanguticum	SRR14140285	no	2
Rhododendron_dauricum	SRX20942273	no	0
Rhododendron_irroratum	SRR23356328	no	3
Rhopalocnemis_phalloides	SRR14800310	no	0
Robinia_pseudoacacia	SRX23204745	no	4
Rubia_tinctorum	SRX8453011	no	3
Rubroshorea_curtisii	SRR16214518	no	2
Rumex_hastatulus	SRR11999010	no	2
Sabia_swinhoei	SRR17229682	no	1
Saccharum	SRR22018137	no	0
Sagittaria_latifolia	SRX15247742	no	0
Salvia_miltiorrhiza	SRR21619485	no	9
Salvia_yangii	SRR16508315	no	11
Santalum_album	SRR5150444	no	3
Saposhnikovia_divaricata	SRR22477893	no	1
Sarcandra_glabra	SRR12888158	no	0
Sassafras_albidum	SRR8298324	no	0
Sassafras_tzumu	SRR8298322	no	0
Sauromatum_giganteum	SRX14901251	no	0
Sauromatum_sp._JHLM-2021	SRX15245100	no	0
Sauromatum_venosum	SRX14901264	no	0
Scheuchzeria_palustris	SRX17620308	no	0
Schisandra_chinensis	SRR14695557	no	0
Schismatoglottis_neoguineensis	SRX14865572	no	4
Schoenoplectus_triqueter	ERX11656596	no	0
Scutellaria_baicalensis	SRR22680020	no	1
Scyphiphora_hydrophyllacea	SRR18449577	no	4
Secale_cereale	ERX11698112	no	0
Selenicereus_undatus	SRR19863829	no	7
Sesuvium_verrucosum	SRR15860165	no	19
Setaria_italica	ERX5508113	no	0
Sicyos_edulis	SRR11573043	no	3
Sinogentiana_striata	SRX6610696	no	2
Siraitia_grosvenorii	SRR214337	no	3
Smallanthus_sonchifolius	SRR18215731	no	3
Smilax_rotundifolia	SRR6451340	no	0
Sonneratia_apetala	SRR3099211	no	3
Spathiphyllum_kochii	SRX16215461	no	3
Spigelia_splendens	SRR12034775	no	4
Spinulum_annotinum	ERX2099928	no	1
Spirodela_polyrhiza	SRX19507620	no	0
Squamellaria_imberbis	SRR14731637	no	11
Stachyurus_obovatus	SRR9671167	no	6
Stangeria_eriopus	SRR23044175	no	0
Sterculia_nobilis	SRR5138319	no	1
Steudnera_colocasiifolia	SRX14887974	no	0
Strelitzia_reginae	SRX5229646	no	2
Strychnos_nux-vomica	SRX14829254	no	5
Strychnos_sp._BH-2022a	SRX14875669	no	6
Strychnos_spinosa	ERX2099601	no	6
Stuckenia_pectinata	SRX20822892	no	0
Styrax_tonkinensis	SRR18356324	no	5
Swertia_bimaculata	SRX8542424	no	3
Swertia_cincta	SRX6610683	no	1
Swertia_emeiensis	SRX6610703	no	4
Swertia_japonica	SRX1688200	no	3
Swertia_macrosperma	SRX6610719	no	3
Swertia_mussotii	SRX1978998	no	1
Syngonium_erythrophyllum	SRX14887937	no	0
Syngonium_podophyllum	SRX14887939	no	2
Tabernaemontana_elegans	SRX096093	no	6
Tacca_chantrieri	SRR19179844	no	0
Talbotia_elegans	SRR19179852	no	0
Talipariti_hamabo	SRR15713046	no	18
Tapiscia_sinensis	SRR6926471	no	4
Taxillus_chinensis	SRR9266815	no	0
Tetracentron_sinense	SRR11566832	no	0
Tetraena_mongolica	SRR7820713	no	7
Thalia_dealbata	SRR23717304	no	0
Thesium_chinense	SRR5917894	no	4
Thlaspi_arvense	SRR802670	no	1
Thuja_plicata	SRX20253389	no	0
Thymus_mandschuricus	SRR23269176	no	3
Tilia_americana	SRR22133653	no	0
Tilia_cordata	SRR7943977	no	2
Torenia_fournieri	SRR23272310	no	2
Trachycarpus_fortunei	SRX19220160	no	0
Tradescantia_hirsutiflora	SRX7944589	no	0
Tradescantia_pallida	SRR8873503	no	2
Trapa_natans	SRR18449605	no	4
Tribulus_terrestris	SRR17194540	no	12
Tricalysia_congesta_subsp._congesta	SRR9203074	no	7
Trichilia_tuberculata	SRR15016169	no	3
Trichodesma_hildebrandtii	SRR12034787	no	3
Tricyrtis_formosana	DRX468043	no	0
Trifolium_ambiguum	SRR22514172	no	9
Trigonella_foenum-graecum	SRR14721913	no	9
Tripterospermum_cordatum	SRX6610704	no	7
Tripterospermum_membranaceum	SRX6610682	no	5
Tripterospermum_sp._Zhang_4686	SRX8542383	no	5
Tripterospermum_volubile	SRX6610681	no	6
Tripterygium_regelii	SRR3583049	no	6
Tripterygium_wilfordii	SRR12059214	no	8
Trithuria_bibracteata	SRR12832745	no	0
Trochodendron_aralioides	SRR9304497	no	0
Tulipa_gesneriana	SRX10168880	no	0
Typhonium_roxburghii	SRX14901151	no	0
Typhonodorum_sp._LZ-2022a	SRX14887971	no	1
Ulearum_donburnsii	SRX14865580	no	0
Uncaria_rhynchophylla	SRR17387612	no	7
Vaccinium_corymbosum	SRX22201388	no	6
Vahlia_capensis	SRR11994212	no	4
Vanilla_planifolia	SRX11714029	no	0
Veratrilla_baillonii	SRX1032805	no	3
Veratrum_album	SRR11487678	no	0
Veratrum_nigrum	SRX18834080	no	1
Victoria_cruziana	SRR10158663	no	0
Vigna_radiata	SRX22832437	no	3
Vinca_minor	ERX4622435	no	6
Vincetoxicum_mongolicum	SRX1550132	no	5
Vincetoxicum_versicolor	SRX7509866	no	1
Viscum_album	SRR5724712	no	0
Viscum_coloratum	SRR4473609	no	0
Vitis_rotundifolia	SRR19309443	no	1
Voacanga_thouarsii	SRX16015266	no	5
Warburgia_ugandensis	SRR1942955	no	0
Weigela_florida	SRR12009640	no	2
Wigandia_ecuadorensis	SRR12034818	no	3
Wolffia_australiana	SRX11059636	no	0
Wrightia_natalensis	ERX2099596	no	5
Wrightia_religiosa	SRX357357	no	0
Wurfbainia_villosa	SRX4092621	no	0
Xanthosoma_brasiliense	SRX14887969	no	0
Xenostegia_tridentata	SRR12009667	no	1
Xerophyta_humilis	SRX5146320	no	0
Xiphidium_caeruleum	SRR19182622	no	0
Xylocarpus_granatum	SRR18449620	no	5
Yua_thomsonii	SRR21846904	no	4
Yucca_gloriosa	SRX3607158	no	0
Zantedeschia_aethiopica	SRR18766085	no	0
Zantedeschia_hybrid_cultivar	SRX20069260	no	6
Zataria_multiflora	SRR12769236	no	2
Zea_mays	SRX19444804	no	1
Zingiber_nudicarpum	SRX13980730	no	2
Zingiber_officinale	SRX18179755	no	1
Ziziphus_acidojujuba	SRX12909844	no	61
Ziziphus_jujuba_var._spinosa	SRX19499644	yes	16
Ziziphus_nummularia	SRR2058069	yes	23
Ziziphus_spina-christi	SRX19499651	yes	42
Zostera_marina	SRX19556940	no	0
Zygophyllum_xanthoxylum	SRR22350214	no	2

## Sheet: Rhamnaceae
Species	SRA #	Precursor Peptide A	Precursor Peptide B	Precursor Peptide C
Ceanothus americanus	SRX15394148	DFSVDPSGNILLYHG	DISVDPSGNILWYHG	DFSVDPSGNPLFYHG
Ceanothus thyrsiflorus	SRR6384554	DLSVDPSSNLLIYHG	DFSVDPSGNVLWYHG	DFSIDPSGNVFIYHG
Hovenia acerba	SRR5003663	VKEVDPSANLLLYHG	x	x
Ochetophila trinervis	SRR5349278	DVSVDPSGNILWYHG	DVSVDPSGNILWYHG	DLSVDPSSNFLIYHG
Rhamnella rubrinervis	SRR9733465	x	x	x
Ziziphus acidojujuba	SRX12909844	GQSIDPSSLLLIYHG	GQSVDPSSFLPIYHG	QQSVDPLSRWPIYNG
Ziziphus jujuba var. spinosa	SRX19499644	VLSVDPSSAVPFYHG	GQSVDPSSFIPIYHG	GQSIDPSSFFPFYHG
Ziziphus spina-christi	SRX19499651	GQSVDPSSFLPIYHG	GQSIDPSSLLLIYHG	GQSVDPSSRWPIYHG
Ziziphus nummularia	SRR2058069	GQSVDPSSFVPLYHG	DNSVDPSSFIPIYHG	DNSVDPSSFIPIYHG
Alignment
SRR6384554_A DLSVDPSSN-LLIYHG
SRR5349278_C DLSVDPSSN-FLIYHG
SRR6384554_B DFSVDPSGN-VLWYHG
SRR5349278_A DVSVDPSGN-ILWYHG
SRX15394148_B DISVDPSGN-ILWYHG
SRR5349278_B DVSVDPSGN-ILWYHG
SRX15394148_A DFSVDPSGN-ILLYHG
SRX15394148_C DFSVDPSGN-PLFYHG
SRR6384554_C DFSIDPSGN-VFIYHG
SRR5003663_A VKEVDPSAN-LLLYHG
SRX19499651_A GQSVDPSS-FLPIYHG
SRX12909844_B GQSVDPSS-FLPIYHG
SRR2058069_A GQSVDPSS-FVPLYHG
SRX19499644_B GQSVDPSS-FIPIYHG
SRX19499644_C GQSIDPSS-FFPFYHG
SRR2058069_B DNSVDPSS-FIPIYHG
SRR2058069_C DNSVDPSS-FIPIYHG
SRX19499651_B GQSIDPSS-LLLIYHG
SRX12909844_A GQSIDPSS-LLLIYHG
SRX19499651_C GQSVDPSSR-WPIYHG
SRX19499644_A VLSVDPSS-AVPFYHG
SRX12909844_C QQSVDPLSR-WPIYNG

## Sheet: Rubiaceae 
Species	SRA #	Precursor Peptide A	Precursor Peptide B	Precursor Peptide C
Palicourea_croceoides	SRX15298275	x	x	x
Cinchona calisaya	SRR1021741	KDFDSRNAQILLYHR	KDFDSRNAQIHLYHR	KDFDSKNANLFPYQY
Luculia_gratissima	SRR12328860	x	x	x
Luculia_yunnanensis	SRR17806413	x	x	x
Gonzalagunia_spicata	SRX15298279	x	x	x
Hamelia_patens	SRR12375046	x	x	x
Chiococca_alba	SRX5862354	KDFDSKDPNILQYYT	KDFDSKDPNILQYYN	x
Uncaria_rhynchophylla	SRR17387612	x	x	x
Neolamarckia_cadamba	SRR1107781	x	x	x
Mitragyna_speciosa	SRR12673042	KDFDSKDPNILQYYT	x	x
Ixora_ferrea	SRX15298274	x	x	x
Emmenopterys_henryi	SRR9878962	ENFDSKNAQILFYHG	EDFDSKNAQFLLYHG	x
Scyphiphora_hydrophyllacea	SRR18449577	TDFESKPESFFFYHA	KDFESKPASFLFYHG	KGFETKPESLLLYHA
Randia_armata	SRR15016244	KDFEAKSGSLFPYLY	x	x
Gardenia_jasminoides	SRR19137756	KAFESKPESILLYHG	KDFEAKPGSFFFYHS	KDFEAKSGSFFIYHS
Tricalysia_congesta	SRR9203074	KDFESEPESILLYHG	NDFESKPESFLLYHG	x
Coffea_liberica	SRR12034810	FSFSTLPDSRFQIYNR	x	x
Coffea_canephora	SRX13836517	KDFESKLGSLLLYNY	KDFESKPESVLFIWGG	KDFESKPESILFIWGG
Coffea_arabica	SRX18488006	KGFESKPGSFLWGYQG	KDFESKPESVLILYRG	KDFESKSESVLLFYGG
Coffea_pseudozanguebariae	SRX5974247	KDFESKPGSFLWGYQG	x	x
Coffea_eugenioides	SRX11917459	KDFESKPGSFLWGYQG	KDFESKPESLLFFYGG	KDFESKPESFLILYNG
Coffea_humblotiana	SRR12792037	KDFESKPGSFFFYHG	KDFESKPGALFFYHG	QDFESKPASIFFYHG
Ophiorrhiza_pumila	SRR5007331	x	x	x
Carapichea_ipecacuanha	DRX341344	x	x	x
Oldenlandia_affinis	SRR7440026	x	x	x
Oldenlandia_corymbosa	ERX10607346	x	x	x
Morinda_citrifolia	SRR18449576	x	x	x
Gynochthodes_officinalis	SRR14070834	x	x	x
Rubia_tinctorum	SRX8453011	x	x	x
Pseudogalium_paradoxum	SRR21619438	x	x	x
Galium_boreale	ERX2099605	x	x	x
Galium_tinctorium	SRX3526569	x	x	x
Galium_triflorum	SRX3526580	x	x	x
Galium_mollugo	SRX8467360	x	x	x
Galium_aparine	SRX8025198	x	x	x
Squamellaria_imberbis	SRR14731637	KDFGLERPSFLVYQN	KDFGLERPSVLWYNP	KDFGLERPSFLLYPS
Psychotria_grandis	SRR7388640	x	x	x
Psychotria_revoluta	SRR7388645	x	x	x
Psychotria_marginata	ERX2099606	KNFDTRHESFWIYHG	KDFDSEQGNFYFYHG	x
Psychotria_gabriellae	SRR7388632	x	x	x
Psychotria_costivenia	SRX4261237	x	x	x
Psychotria_deflexa	SRX15298263	x	x	x
Psychotria_semperflorens	SRR7388634	KDFELERPSIPFYPS	KDFELERPSVLLYHK	KDFELERPSLLPYYT
Psychotria_rubra	SRR15421042	KDFDSEQGNFWIYHG	x	x
Alignment
SRR1021741_A KDFDSRNAQILL-YHR
SRR1021741_B KDFDSRNAQIHL-YHR
SRR9878962_B EDFDSKNAQFLL-YHG
ERX2099606_A KNFDTRHESFWI-YHG
ERX2099606_B KDFDSEQGNFYF-YHG
SRR15421042_A KDFDSEQGNFWI-YHG
SRR18449577_A TDFESKPESFFF-YHA
SRR19137756_B KDFEAKPGSFFF-YHS
SRR19137756_C KDFEAKSGSFFI-YHS
SRR12792037_A KDFESKPGSFFF-YHG
SRR18449577_B KDFESKPASFLF-YHG
SRR9203074_B NDFESKPESFLL-YHG
SRR12792037_B KDFESKPGALFF-YHG
SRR12792037_C QDFESKPASIFF-YHG
SRR18449577_C KGFETKPESLLL-YHA
SRR19137756_A KAFESKPESILL-YHG
SRR9203074_A KDFESEPESILL-YHG
SRX13836517_B KDFESKPESVLFIWGG
SRX13836517_C KDFESKPESILFIWGG
SRX11917459_B KDFESKPESLLFFYGG
SRX18488006_C KDFESKSESVLLFYGG
SRX18488006_B KDFESKPESVLILYRG
SRX11917459_C KDFESKPESFLILYNG
SRX18488006_A KGFESKPGSFLWGYQG
SRX5974247_A KDFESKPGSFLWGYQG
SRX11917459_A KDFESKPGSFLWGYQG
SRR15016244_A KDFEAKSGSLFP-YLY
SRX13836517_A KDFESKLGSLLL-YNY
SRR1021741_C KDFDSKNANLFP-YQY
SRR9878962_A ENFDSKNAQILF-YHG
SRX5862354_A KDFDSKDPNILQ-YYT
SRR12673042_A KDFDSKDPNILQ-YYT
SRX5862354_B KDFDSKDPNILQ-YYN
SRR14731637_A KDFGLERPSFLV-YQN
SRR14731637_C KDFGLERPSFLL-YPS
SRR14731637_B KDFGLERPSVLW-YNP
SRR7388634_A KDFELERPSIPF-YPS
SRR7388634_B KDFELERPSVLL-YHK
SRR7388634_C KDFELERPSLLP-YYT
SRR12034810_A FSFSTLPDSRFQIYNR

## Sheet: _x0009_Amaranthaceae
Species	SRA #	Precursor Peptide A	Precursor Peptide B	Precursor Peptide C
Chenopodium_quinoa	SRX22113561	KDFVPKPNHVLQWHH	x	x
Atriplex_imbricata	SRR13316945	KDFEPRPNPVLFWWQ	KDFEPRPNQVLYWWQ	RDFEPKINHVLQWHH
Krascheninnikovia_arborescens	SRR21095983	KDFEPRPNQLLVWRNHKQ	KDFEPRPNQLLVWRGHKE	KDFEPRPNQLLVWREHLK
Haloxylon_ammodendron	SRR18715547	QDFVPKPNHVLQWHQHGG	x	x
Alternanthera_bettzickiana	SRR15506171	EKFGVEQPDLFFYQYHS	KKFGVEQPDLFLYQYHS	KNFGVEQPDLLLYGYHS
Amaranthus_tricolor	SRX11406718	NDFDLKPNLLLYPKYGE	NDFDPKSNWFYYPKYGE	x
Celosia_cristata	SRX5870469	KDFEYRPNQLLVWRGHNR	KDFEPKSNFLFYGYRK	x
Alignment
SRR13316945_A KDFEPRPN-PVLFW---WQ
SRR13316945_B KDFEPRPN-QVLYW---WQ
SRR21095983_A KDFEPRPN-QLLVWRNHKQ
SRR21095983_B KDFEPRPN-QLLVWRGHKE
SRR21095983_C KDFEPRPN-QLLVWREHLK
SRX5870469_A KDFEYRPN-QLLVWRGHNR
SRR13316945_C RDFEPKIN-HVLQW---HH
SRR18715547_A QDFVPKPN-HVLQWHQHGG
SRX11406718_A NDFDLKPN-LLL-YPKYGE
SRX11406718_B NDFDPKSN-WFY-YPKYGE
SRR15506171_A EKFGVEQPDLFF-YQ-YHS
SRR15506171_B KKFGVEQPDLFL-YQ-YHS
SRR15506171_C KNFGVEQPDLLL-YG-YHS
SRX5870469_B KDFEPKSN--FLFYG-YRK
SRX22113561_A KDFVPKPN-HVLQW---HH

## Sheet: Malvaceae 
Species	SRA #	Precursor Peptide A	Precursor Peptide B	Precursor Peptide C
Hibiscus_syriacus	SRX2142890	KARKESVINQIPLLYYP	NAGRESVINQIPLFYYP	VKDFDPNRPQFPLVYYS
Hibiscus_cannabinus	SRR23032151	VNDFDPNRPQFPFIYHL	VKDFDPNRPQFPLLYYS	VKDFDPNRPQLPLMYYS
Hibiscus_mutabilis	SRR19078899	x	x	x
Abelmoschus_manihot	SRR17184302	x	x	x
Kosteletzkya_pentacarpos	SRR16370740	VKDFDPNRPQFPLIYYS	VKDFDPNRPQFPLVYYS	x
Talipariti_hamabo	SRR15713046	IKDFDPNRPQFPLIYYS	VRDFDPNRPQLPLLYYS	NAEQRAVINQIPLFYYP
Althaea_officinalis	SRR23908484	x	x	x
Quararibea_asterolepis	SRR15016156	VKDFDPNRPQFPLYFHL	VKDFDPNRPQFLLYFHQ	VKDFDPNRPQLPLIYYL
Alignment
SRX2142890_A KARKESVINQIPLLYYP
SRX2142890_B NAGRESVINQIPLFYYP
SRR15713046_C NAEQRAVINQIPLFYYP
SRX2142890_C VKDFDPNRPQFPLVYYS
SRR16370740_A VKDFDPNRPQFPLIYYS
SRR23032151_B VKDFDPNRPQFPLLYYS
SRR16370740_B VKDFDPNRPQFPLVYYS
SRR23032151_C VKDFDPNRPQLPLMYYS
SRR15713046_B VRDFDPNRPQLPLLYYS
SRR15713046_A IKDFDPNRPQFPLIYYS
SRR15016156_C VKDFDPNRPQLPLIYYL
SRR23032151_A VNDFDPNRPQFPFIYHL
SRR15016156_A VKDFDPNRPQFPLYFHL
SRR15016156_B VKDFDPNRPQFLLYFHQ

## Sheet: Icacinaceae 
Species	SRA #	Precursor Peptide A	Precursor Peptide B	Precursor Peptide C
Merrilliodendron_megacarpum	SRR12006303	AKDFEPNPNQLLVWKTHNA	AKDFEPNPNQLLLWREHKA	AKDFEPNPNQLLVWREHNA
Cassinopsis_ilicifolia	SRR12006304	x	x	x
Natsiatopsis_thunbergiifolia	SRR12009644	x	x	x
Nothapodytes_nimmoniana	SRR19262135	x	x	x
Pyrenacantha_malvifolia	SRR11994211	AKDFEPNPNQLLLWREHNG	AKDFEPNPNQLLVWREHNA	x
Iodes_cirrhosa	SRR12009641	x	x	x
Mappia_racemosa	SRR11994210	AKDFEPNPNQLLLWREHKA	x	x
Alignment
SRR12006303_A AKDFEPNPNQLLVWKTHNA
SRR12006303_B AKDFEPNPNQLLLWREHKA
SRR11994210_A AKDFEPNPNQLLLWREHKA
SRR12006303_C AKDFEPNPNQLLVWREHNA
SRR11994211_B AKDFEPNPNQLLVWREHNA
SRR11994211_A AKDFEPNPNQLLLWREHNG
